# Supplementary material for: Fatty Acid Production and Direct Acyl Transfer through Polar Lipids Control TAG Biosynthesis during Nitrogen Deprivation in the Halotolerant Alga Dunaliella tertiolecta
Source: MDPI journal article supplement (doi:10.3390/md19070368), 2021-06-25

Figure S6

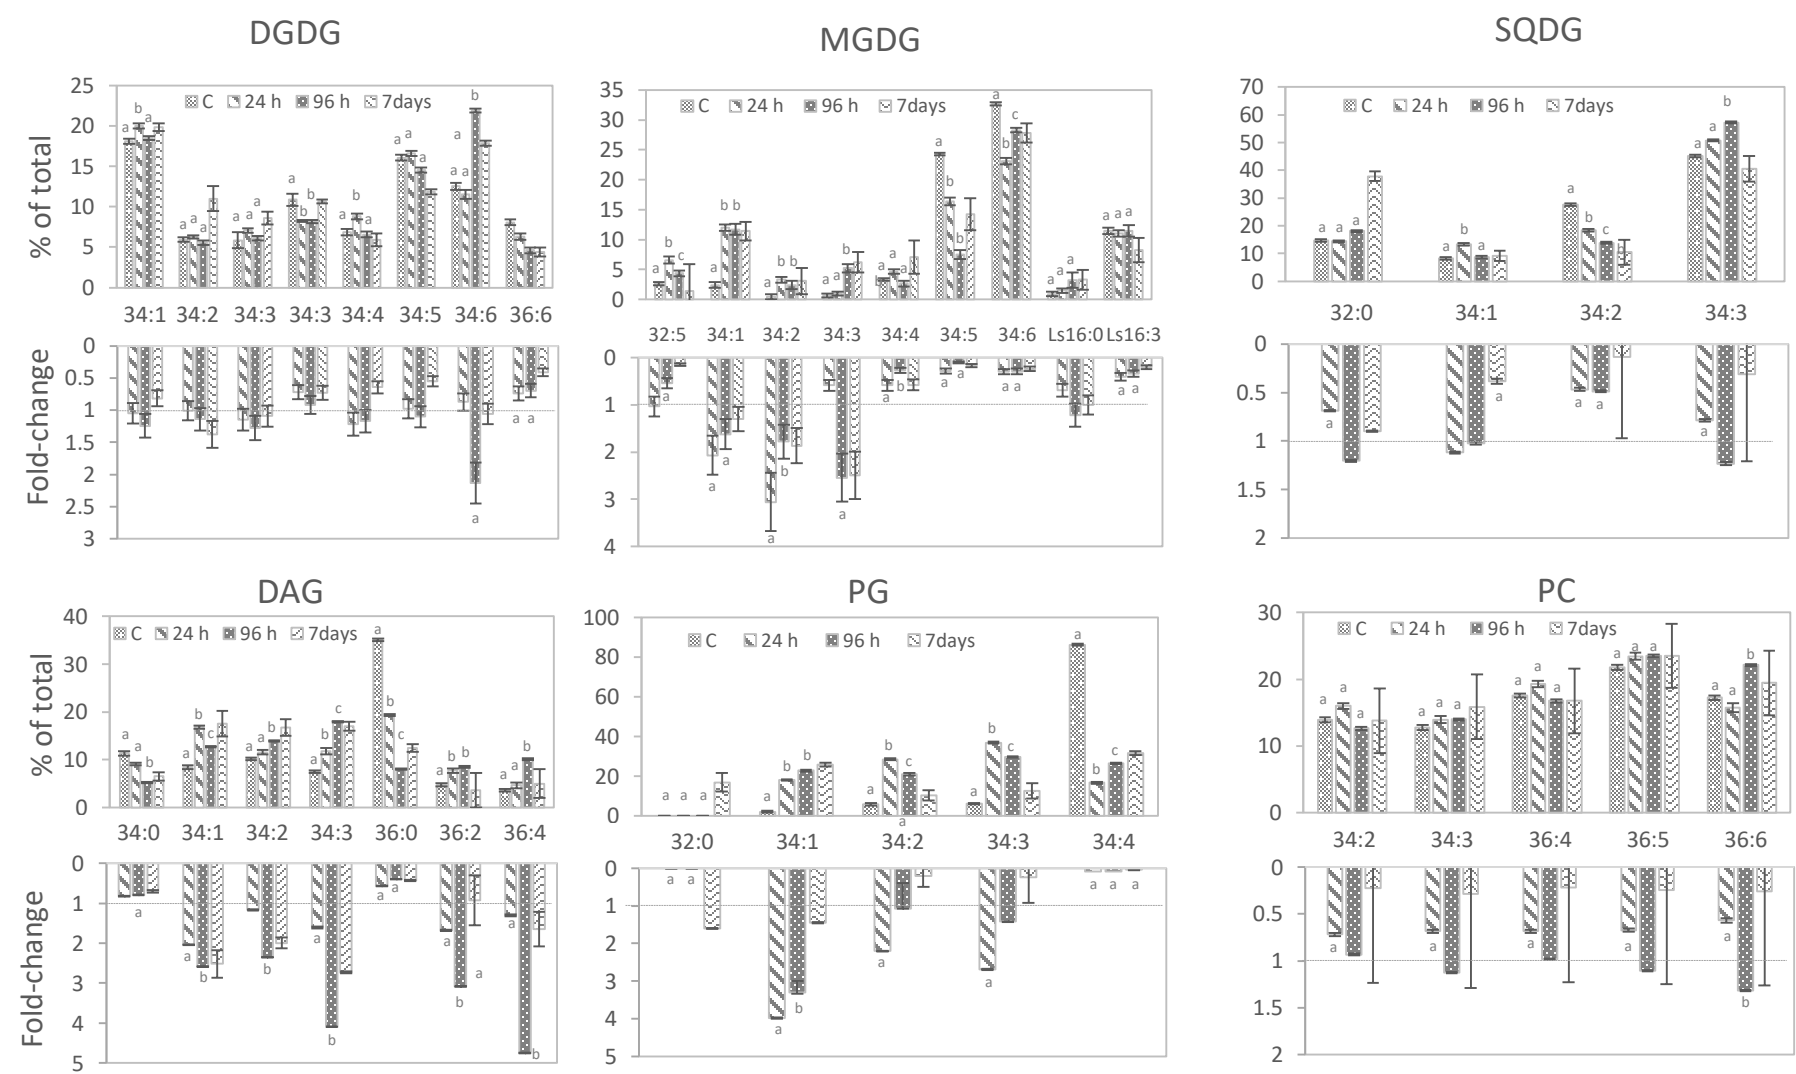

Figure S6: Relative changes in the level (bottom) and composition (up) of major PL species (polar lipids). Data presented for each individual lipid as fold-change (relative to control) and as % of total (class), respectively. Error bars: for % – standard deviation, for Fold change - coefficient of variation. Letters represent statistical tests within each class which were carried out using ANOVA, Post Hoc LSD test, p<0.05.

## PE

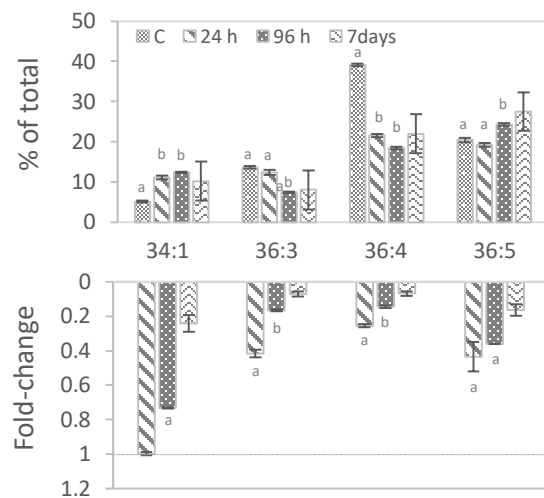

## DGTS

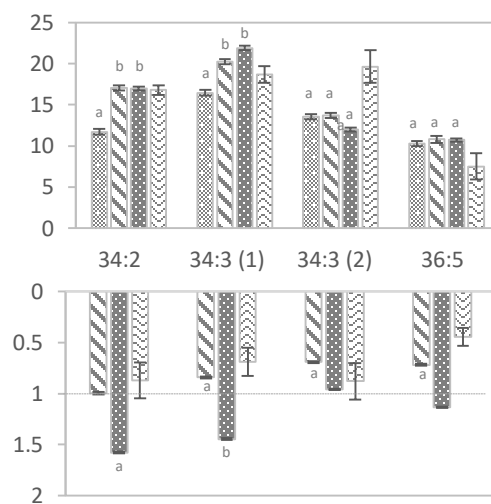

Supplement: s1 [file s1]
