# Supplementary material for: Fatty Acid Production and Direct Acyl Transfer through Polar Lipids Control TAG Biosynthesis during Nitrogen Deprivation in the Halotolerant Alga Dunaliella tertiolecta
Source: MDPI journal article supplement (doi:10.3390/md19070368), 2021-06-25
Supplement: s1 [file s1]

Figure S1:

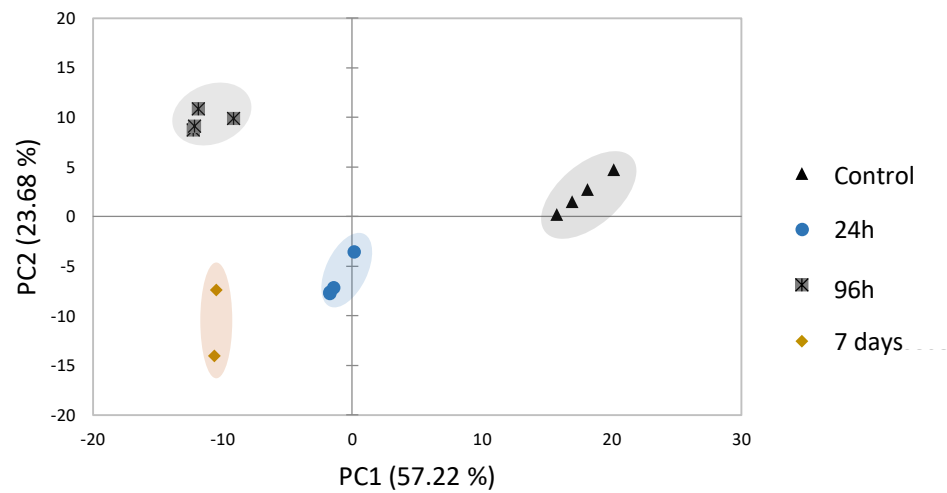

Figure S1: Total lipidome separation by PCA (including TAG). PCA explains 80% of the distribution of the data, and shows a clear separation between induced and non-induced cells suggesting redistribution of the lipidome in response to N deprivation. Data used – normalized peak area.
