# Supplementary material for: Fatty Acid Production and Direct Acyl Transfer through Polar Lipids Control TAG Biosynthesis during Nitrogen Deprivation in the Halotolerant Alga Dunaliella tertiolecta
Source: MDPI journal article supplement (doi:10.3390/md19070368), 2021-06-25
Supplement: s1 [file s1]

### **Supplement 1: Calculation and measurement of dilution of $^{14}\text{C}$ -bicarbonate with atmospheric $\text{CO}_2$ .**

The dilution of  $^{14}\text{C}$ -bicarbonate during the labeling by atmospheric  $\text{CO}_2$  (Figure 2) was estimated by calculation and by direct measurements. Calculation of the level of  $\text{CO}_2$  dissolution from the air was made by assuming a  $\text{CO}_2$  transfer velocity of  $10 \text{ cm h}^{-1}$  in air (46) and a  $\text{CO}_2$  concentration of 400 ppm. The calculated level of  $\text{CO}_2$  dissolution in 24 h is 430  $\mu\text{M}$  which is less than 1% of the total bicarbonate in the labeling solution. For the experimental measurement of  $\text{CO}_2$  dissolution, 400 ppm of  $^{14}\text{C}$ - $\text{CO}_2$  gas was injected through a syringe to a flask sealed with a rubber cork, in which *D. tertiolecta* cells grow in complete growth medium containing 50 mM unlabeled bicarbonate and incubated for 24 h under the experimental conditions described above. The measured level of dissolved  $^{14}\text{C}$ - $\text{CO}_2$  was 580  $\mu\text{M}$ . In parallel, we measured the loss of  $^{14}\text{C}$  from the  $^{14}\text{C}$ -bicarbonate labeling medium due to diffusion and the level of  $^{14}\text{C}$  incorporation into the cells during the first 24 h of incubation (14), and obtained values of 6% and 3% of the total  $^{14}\text{C}$ -bicarbonate, respectively. The calculated dilution factor of  $^{14}\text{C}$  in the labeling medium by atmospheric  $\text{CO}_2$  according to these values is 1.013 (1.3%). It should be noted that the significance of dilution by atmospheric  $\text{CO}_2$  is relevant only during the first 48 h of labeling because under N deprivation photosynthetic  $\text{CO}_2$  assimilation decreases to 50% after 24 h and to less than 10% after 48 h. After this period, lipids are produced from the pre-labeled starch and PL [15].
