# Supplementary material for: Fatty Acid Production and Direct Acyl Transfer through Polar Lipids Control TAG Biosynthesis during Nitrogen Deprivation in the Halotolerant Alga Dunaliella tertiolecta
Source: MDPI journal article supplement (doi:10.3390/md19070368), 2021-06-25
Supplement: s1 [file s1]

Figure S2:

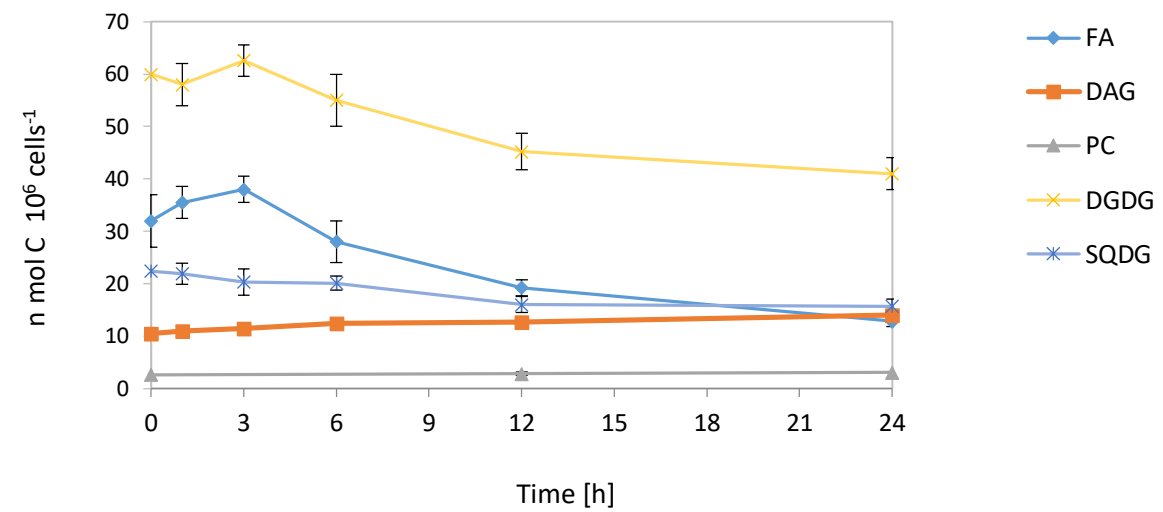

Fig. S2: Extended view of changes in the steady-state levels of individual lipids during 24 h of N deprivation (taken from Figure 1B). Error bars represent standard deviation (n=3).
