# Supplementary material for: Fatty Acid Production and Direct Acyl Transfer through Polar Lipids Control TAG Biosynthesis during Nitrogen Deprivation in the Halotolerant Alga Dunaliella tertiolecta
Source: MDPI journal article supplement (doi:10.3390/md19070368), 2021-06-25
Supplement: s1 [file s1]

Figure S5:

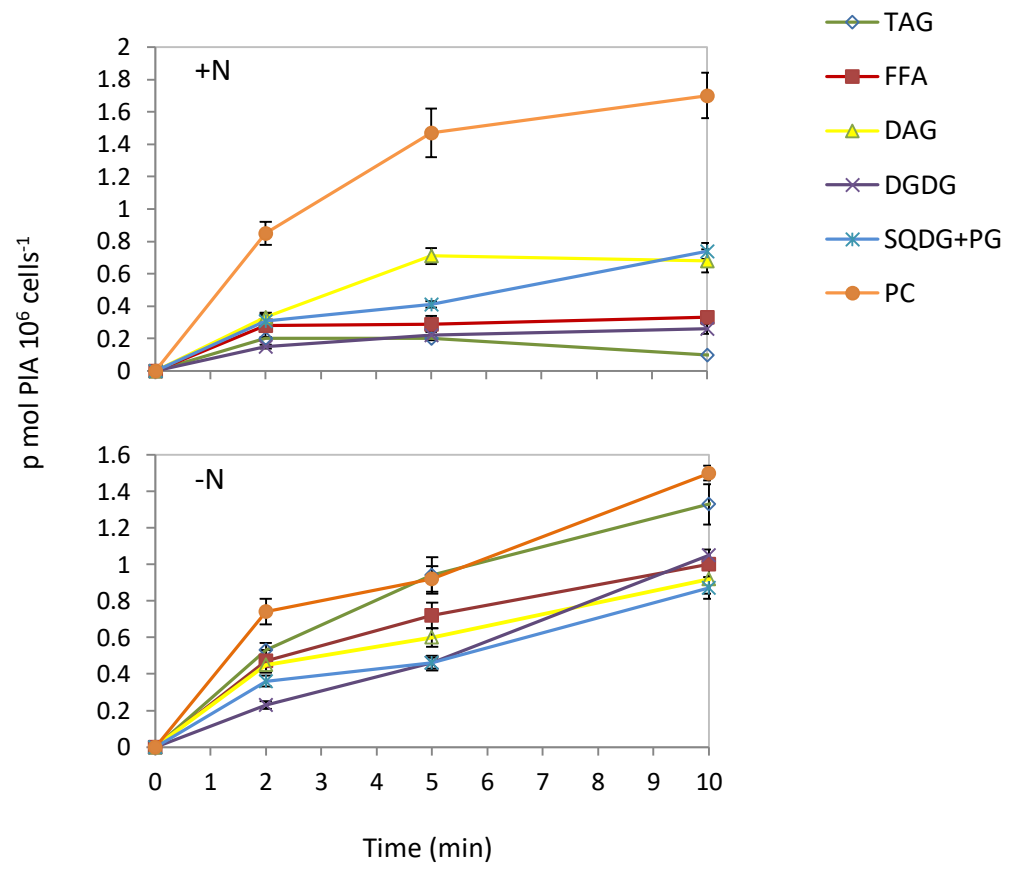

Figure S5: Extended view of incorporation of <sup>14</sup>C-PIA into different lipids. *D. tertiolecta* during the first 10 minutes (taken from Fig. 4). Error bars represent standard deviation.
