# Supplementary material for: Fatty Acid Production and Direct Acyl Transfer through Polar Lipids Control TAG Biosynthesis during Nitrogen Deprivation in the Halotolerant Alga Dunaliella tertiolecta
Source: Mar Drugs. 2021 Jun 25;19(7):368. doi: 10.3390/md19070368 (PMC8304655; doi:10.3390/md19070368)
Supplement: Supplementary file 1 [file marinedrugs-19-00368-s001.zip › Supplement 3 - DATA normalized peaks.xlsx]

## Sheet: Dt normalaized peak area
Normalized avarage peak area of all detected lipids (272):
Lipid	C	std	24 h	std	96 h	std	7 days	std
MGDG 32:2	54.9711	4.71991	3.73819	7.47637	0	0	28.8327	13.5919
MGDG 32:3	236.815	60.0442	41.8565	13.1381	28.1392	17.9251	51.4223	17.7111
MGDG 32:4 (1)	979.614	76.7735	99.0845	19.1979	33.4118	12.2287	14.3478	0.359131
MGDG 32:4 (2)	598.165	72.1896	244.108	65.1441	45.7353	20.0911	33.1422	15.6234
MGDG 32:5	3552.84	277.967	3669.52	603.95	1935.83	90.9211	499.931	235.67
MGDG 32:6	614.301	57.1207	664.426	128.606	288.408	27.9665	84.6843	34.4201
MGDG 34:1	3221.59	431.88	6661.55	1023.34	5211.76	444.379	4172.32	631.99
MGDG 34:2 (1)	4119.95	409.699	1840.66	364.766	1705.21	132.186	1281.59	132.302
MGDG 34:2 (2)	605.846	78.4847	1851.13	254.994	1077.34	66.1806	1129.93	248.319
MGDG 34:3	912.007	93.1741	534.023	44.4117	2320.37	163.573	2270.8	370.197
MGDG 34:4 (1)	4481.97	251.107	2600.06	251.665	1188.74	51.495	2577.87	743.368
MGDG 34:5	32323	1727.66	9139.82	1840.15	3332.98	248.97	5202.93	1430.36
MGDG 34:6	43461.1	3651.98	12864.1	2006.82	12585.5	341.539	10160.4	1509.99
MGDG 36:2	658.542	63.9215	487.792	99.3892	880.489	63.39	180.358	85.0218
MGDG 36:3	924.753	87.3305	141.601	24.5502	343.751	27.8157	90.6712	42.7428
MGDG 36:4	1141.5	85.108	124.836	38.5577	358.548	51.2582	132.186	62.3129
MGDG 36:5	330.105	59.5946	18.4301	15.4826	64.2568	19.5966	42.1717	19.8799
MGDG 36:6	1884.36	160.384	141.243	25.2184	287.81	21.6139	277.592	19.8278
DGDG 32:0	5060.55	573.936	3445.34	369.093	4400.52	366.382	3441.09	283.581
DGDG 32:1 (1)	362.455	47.5316	368.261	51.2739	230.773	32.4664	350.995	90.5541
DGDG 32:2 (1)	1138.79	128.856	644.606	67.5335	637.193	25.7438	349.349	39.6043
DGDG 32:2 (2)	510.848	50.9013	148.799	12.1018	147.8	19.7724	214.216	66.0805
DGDG 32:3 (1)	4372.71	739.174	3853.05	305.896	5739.75	598.142	1830.53	539.227
DGDG 32:3 (2)	3242.55	425.91	1236.69	162.353	594.532	69.9181	478.004	134.323
DGDG 32:4 (1)	250.95	40.558	161.76	39.5212	98.2562	13.0785	87.4958	32.3707
DGDG 32:4 (2)	129.141	27.9118	169.64	20.5216	115.681	20.7291	12.7296	6.00079
DGDG 34:0	2846.1	286.255	3743.09	389.752	4263.54	256.413	2271.27	201.939
DGDG 34:1	41177.1	3905.6	43164.7	4187.44	51229.1	3570.21	33522	1518.69
DGDG 34:2 (1)	13508.2	914.682	13588.9	677.207	15409.8	1203.07	18605.6	3010.98
DGDG 34:2 (2)	831.158	107.4	3612.36	416.617	3889.02	296.078	807.188	380.512
DGDG 34:3 (1)	13313.8	4084.49	15259.5	1106.79	16990.7	1367.48	14500.9	1134.14
DGDG 34:3 (2)	24701.1	5961.99	17791.6	583.345	22689.8	1095.87	18025.5	119.248
DGDG 34:4 (1)	15620.9	1772.22	19029.2	2127.27	18257.7	1774.43	10016.9	808.716
DGDG 34:5	36567.3	4173.05	35804.9	3385.69	40288.9	3944.46	20002.1	489.478
DGDG 34:6	28475.3	3414.31	24860.1	4396.57	60789.9	4523.28	30155.7	668.489
DGDG 36:1	59.1272	12.8037	510.739	105.587	468.813	60.6156	494.609	111.067
DGDG 36:2	423.562	41.0954	379.127	76.0878	299.137	51.5773	190.402	3.12676
DGDG 36:3	299.404	63.7261	602.633	50.2694	1010.9	50.4601	371.77	117.638
DGDG 36:4 (1)	253.236	61.815	208.905	78.2793	122.72	32.4071	106.164	22.9584
DGDG 36:4 (2)	705.286	97.9229	1279.66	78.2602	1449.09	223.026	643.121	252.182
DGDG 36:5	1746.14	169.819	1219.48	101.337	875.781	94.1038	744.918	56.0399
DGDG 36:6	18355.2	1841	13542.1	1655.95	12792	1396.93	7447.92	395.534
DGDG 38:5	34.181	12.6426	35.5504	18.2231	12.5057	11.2117	3.34108	1.575
DGDG 38:6	50.2651	0	20.9676	9.12717	45.8672	12.2437	7.7695	3.66258
SQDG 30:0	900.979	96.8125	317.164	28.6107	211.772	41.3079	247.331	94.0801
SQDG 32:0	28989.9	3078.1	19903.7	1482.86	34898.1	2792.54	25999.1	276.426
SQDG 32:1	804.323	72.6298	358.53	41.5377	392.36	61.8849	262.289	6.38632
SQDG 32:2	75.101	20.893	23.1501	7.82276	31.304	6.13122	0	0
SQDG 32:3 (1)	0	0	0	0	0	0	0	0
SQDG 32:3 (2)	49.5101	20.215	41.4012	16.5141	30.2238	11.0209	0	0
SQDG 34:0	3608.01	406.591	1706.13	159.203	1133.75	85.2322	357.59	6.44097
SQDG 34:1 (1)	16475.7	1872.77	18425.5	1864.08	16823.2	2232.44	6329.4	424.767
SQDG 34:2	54838.7	6552.24	25572.3	3208.31	26725.8	2416.55	7174.47	3090.62
SQDG 34:3	89453.5	12819.2	70365.8	6663.89	110396	11048.9	27815.4	12367.7
SQDG 34:4	799.497	63.3563	819.597	107.182	1193.29	143.737	322.783	17.9203
SQDG 34:5	400.62	27.8114	118.27	24.3107	75.4635	18.9761	11.5942	3.69857
SQDG 36:2	0	0	0	0	0	0	0	0
SQDG 36:3	295.1	18.6823	137.968	26.2245	158.182	10.2751	26.8838	8.85475
SQDG 36:4	316.942	30.5478	226.429	60.1062	248.52	23.7109	38.9745	18.3728
SQDG 36:5	278.391	33.3991	127.492	23.6869	140.88	7.61074	32.4186	15.2823
SQDG 36:6	749.04	70.1003	375.256	77.2061	493.546	44.2483	93.7464	40.9349
PG 32:0	0	0	0	0	0	0	1615.96	761.769
PG 32:1	0	0	0	0	0	0	297.702	140.338
PG 34:1	1699.32	180.37	6773.25	763.186	5604.98	803.594	2464.38	97.1604
PG 34:2	4832.43	751.454	10647.4	1328.8	5157.96	1111.54	974.082	246.877
PG 34:3	5137.27	439.92	13819.3	1745.24	7275.27	653.575	1197.56	464.237
PG 34:4	72363.5	8545.09	6235.29	697.048	6502.82	609.431	3020.26	50.137
PC 32:1 (1)	1097.29	117.823	274.974	63.9437	182.964	27.7942	64.1329	30.2325
PC 32:1 (2)	352.135	6.82102	98.9332	16.1035	69.7157	36.0356	21.9102	10.3286
PC 32:2	2115.98	221.481	853.479	118.579	763.323	51.459	193.445	91.1911
PC 32:3	1598.51	143.807	576.976	105.535	891.596	92.7206	155.732	73.4128
PC 34:1 (1)	27427.1	2877.94	6271.52	1063.29	15265.8	1249.51	3914.17	1845.16
PC 34:1 (2)	0	0	0	0	0	0	0	0
PC 34:2	176633	21833.4	126957	15935.4	164686	11705.6	40291	18993.3
PC 34:3	162150	16118.8	110608	16878.3	182206	7118.76	46336.7	21843.3
PC 34:4 (1)	1965.37	215.934	205.144	54.6572	264.415	34.7919	66.8437	31.5104
PC 34:4 (2)	758.765	61.8629	391.269	45.3721	320.074	58.1054	60.821	28.6713
PC 34:5	1533.2	141.062	658.122	139.229	875.549	37.8937	167.962	64.4547
PC 34:6	517.807	43.334	261.756	56.5656	586.13	13.8496	106.799	50.3456
PC 36:1	1510.98	195.829	602.021	119.288	1104.17	119.477	266.297	125.534
PC 36:2 (1)	0	0	0	0	0	0	0	0
PC 36:2 (2)	31180.6	2760.02	21240.5	4265.3	25098.3	2064.93	5415.18	2552.74
PC 36:3 (1)	80849.2	7722.49	38734.4	6665.03	71285.7	4780.68	14929.7	7037.94
PC 36:3 (2)	11814.7	804.231	8063.21	1429.24	12227.2	897.712	2749.58	1296.17
PC 36:4	223074	21432.9	152741	21148.8	218407	15052.3	48952.2	23076.3
PC 36:5	276826	29133.8	186166	27925	306415	17819.3	68617.3	32273.5
PC 36:6	219110	21855.2	124656	24812.9	288518	11591.9	56771.2	26762.2
PC 38:3	1911.71	194.636	882.029	190.95	774.199	39.1564	176.879	83.3818
PC 38:4 (1)	7806.18	420.944	2649.58	451.387	1489.16	50.3477	246.678	116.285
PC 38:4 (2)	0	0	341.931	68.9938	443.349	47.972	126.364	59.5685
PC 38:5	7774.4	971.782	3168.61	708.152	2193.76	141.763	398.518	187.863
PC 38:6	1042.96	105.4	767.14	161.096	976.164	61.713	201.603	95.0365
PE 32:2	176.485	37.2615	98.3783	22.5258	43.3528	10.401	9.80817	4.62362
PE 32:3	264.045	17.9583	204.728	31.2591	154.867	15.2782	41.6869	19.6514
PE 32:4 (1)	0	0	0	0	0	0	0	0
PE 32:4 (2)	0	0	0	0	0	0	0	0
PE 32:5	0	0	0	0	0	0	0	0
PE 32:6	0	0	0	0	0	0	0	0
PE 34:1	2686.97	208.432	2682.8	323.439	1968.46	95.6677	651.849	307.285
PE 34:2	1959.01	137.987	2128.6	299.859	1533.93	109.861	460.578	217.118
PE 34:3	2128.02	197.78	1651.49	277.866	1470.32	80.9346	428.385	201.943
PE 34:4	162.611	20.6275	0	0	0	0	0	0
PE 34:5	501.087	94.4371	189.8	35.0178	162.842	26.4284	48.6448	2.63919
PE 34:6	0	0	0	0	0	0	0	0
PE 36:2	2067.39	206.539	2456.35	330.474	1257.21	108.188	411.3	193.889
PE 36:3	7151.41	590.971	2986.98	587.679	1185.52	64.7499	514.125	242.361
PE 36:4	20414.9	1950.56	5203.57	592.432	2934.19	222.992	1403.39	661.565
PE 36:5	10687.3	1848.7	4635.84	686.521	3869.82	384.335	1753.67	826.686
PE 36:6	2871.89	421.356	1391.65	176.429	1299.52	83.6228	634.351	299.036
DGTS 32:0	449.553	66.9574	287.577	42.302	222.893	21.4378	4608.43	2156.2
DGTS 32:1 (1)	11927.4	1025.71	3809.08	658.338	4142.75	315.084	30126.2	13492.2
DGTS 32:1 (2)	6074.46	528.042	5095.93	843.285	1950.11	70.8818	43712.6	20370.4
DGTS 32:2	71722.8	5228.68	46506.9	10194	35831.7	1175.77	28811.4	10738.9
DGTS 32:3	86846.3	7820.58	37514.7	8361.66	33287.2	1843.43	21041.9	7100.98
DGTS 32:4	313377	31152.1	180263	29299.3	174235	9761.74	41430.8	117.697
DGTS 34:1	4255.82	397.446	7791.82	1243.66	19136.2	1450.66	71385	26143.7
DGTS 34:2	603805	65402.3	601793	54649.3	952704	70551.5	526523	467.977
DGTS 34:3 (1)	849162	90364.8	715540	70063.7	1.22925e+06	98731.1	586204	49878.4
DGTS 34:3 (2)	699904	70244.8	484453	44129.7	672313	47618.4	616168	123026
DGTS 34:4	243403	23985	100975	16111.5	170818	7198.33	318371	111978
DGTS 34:5	5451.37	634.438	3056.59	484.004	2420.12	297.48	456.65	37.8866
DGTS 36:1	2224.84	236.925	2825.98	623.119	6169.68	371.484	3375.15	413.381
DGTS 36:2	23781.4	2404.24	25157.2	4690.86	45566.7	3108.72	19486.3	748.486
DGTS 36:3 (1)	61613.2	4727.8	49803.7	9537.36	113952	4614.41	85755.9	17908
DGTS 36:3 (2)	53128.1	5948.35	46772.4	7130.9	108076	5923.47	37104.3	8664.72
DGTS 36:3 (3)	41541.7	3954.73	16384.4	3284.45	23558.7	1352.55	4078.55	1922.65
DGTS 36:4 (1)	374703	37341	262031	36632.1	381892	21253	201644	8521.82
DGTS 36:4 (2)	151653	14523.4	63788.7	14496.6	129358	7630.3	22952.8	10820.1
DGTS 36:5 (1)	530612	44313.7	381857	45760.4	602434	30662	236213	37258.7
DGTS 36:5 (2)	434490	37699.4	182243	24507	257019	11638.4	53087.6	25025.8
DGTS 36:6 (1)	221492	16681.3	155208	26459	344777	16622.9	112564	21798.3
DGTS 36:6 (2)	366052	30044.5	162389	26747.2	303209	11732.9	71856.1	33873.3
PI 34:1	2822.58	270.342	4773.49	203.367	3816.85	185.634	5791.53	925.401
PI 34:2	1734.39	164.661	1635.69	80.0988	2283.7	186.091	1169.42	484.643
PI 34:3	475.599	47.6029	540.045	24.7361	1120.17	85.8648	557.787	228.372
PI 36:3	740.124	93.5983	209.549	24.3285	271.698	30.9597	132.056	62.2518
PI 36:5	125.048	22.8048	16.5854	8.24731	40.8375	15.5851	16.6709	7.85875
DAG 36:5	1379.04	104.315	2115.1	400.317	9772.16	667.745	3434.08	1022.5
DAG 32:0 (1)	1407.32	75.5706	1119.16	69.0533	1123.34	132.681	688.971	172.004
DAG 32:0 (2)	543.08	56.1528	1398.15	211.268	2495.09	202.728	2412.79	596.971
DAG 32:1 (1)	821.735	40.2472	867.741	100.096	1177.12	27.3052	1079.7	117.606
DAG 32:1 (2)	471.191	49.5435	611.02	25.4184	643.037	29.4506	392.068	24.4363
DAG 32:2 (1)	308.617	44.6744	355.611	39.0557	611.349	59.4944	541.888	96.5714
DAG 32:3 (1)	254.117	40.4436	366.161	106.268	1148.24	95.9985	363.713	18.7042
DAG 32:3 (2)	225.856	54.685	206.183	31.6959	316.813	46.3348	175.003	8.74434
DAG 34:0 (1)	12870.5	1741.45	10607	550.222	10182.1	498.381	9011.26	603.502
DAG 34:0 (2)	1717.74	98.2194	1395.16	127.195	1225.98	121.605	1037.73	46.165
DAG 34:1	9618.39	1250.15	19587.1	2101.49	24852.8	983.574	24177.2	6586.3
DAG 34:2	11562.2	943.32	13487.5	2201.56	27189.1	1434.02	23043.4	3931.62
DAG 34:3	8547.2	755.227	13714.6	2682.26	35008.9	1468.82	23320.3	1752.52
DAG 34:4	307.152	84.114	1350.66	258.307	2510.28	101.955	3778.1	1186.92
DAG 34:5	229.193	79.244	689.044	61.8972	2415.68	112.603	2957.1	703.804
DAG 34:6	170.455	100.513	1048.97	143.852	4510.97	197.293	4143.64	683.653
DAG 36:0 (1)	39895.5	2926.34	22565.2	1190.83	15655.7	509.011	17119.3	1078.28
DAG 36:0 (2)	10190.3	978.148	6637.41	653.374	5179.58	390.312	3053.02	555.055
DAG 36:1	397.214	25.719	322.874	36.8861	349.175	39.8871	467.69	134.217
DAG 36:2	5378.85	595.408	9030.88	1321.51	16577.3	1180.85	4954.52	1833.82
DAG 36:3	2216.84	264.961	2425.77	448.955	8247.86	613.657	2758.08	1085.54
DAG 36:4	4174.94	316.51	5435.01	1032.89	19834.7	1397.5	6874.72	2114.64
DAG 36:6	641.292	103.699	844.556	145.023	4067	537.32	1570.89	366.832
DAG 38:2	178.947	29.4877	164.696	32.3238	160.921	22.045	102.142	3.2681
DAG 38:3	189.225	14.5228	93.7589	22.7709	158.662	16.6061	55.934	14.485
DAG 38:4	68.8776	28.0393	58.5818	10.5136	193.866	0.959441	58.2664	27.467
TAG 44:4	3.75908	7.51815	131.55	32.4859	493.879	57.2625	528.27	12.3277
TAG 46:2 (2)	11124.7	851.507	20422.4	782.481	172730	14368.2	160005	71039.6
TAG 46:3 (1)	447.808	88.7559	3208.17	344.429	12668.2	564.652	16681.5	135.335
TAG 46:3 (2)	1472.9	283.145	4266.62	324.056	44471.6	4285.4	41427.1	18059.5
TAG 46:4 (1)	14.1105	18.0379	623.027	87.8407	2367.47	164.994	2552.88	135.84
TAG 46:4 (2)	110.093	50.3599	1349.2	108.475	11295.9	820.422	11564	4014.31
TAG 46:5 (1)	48.2139	33.4748	491.808	36.1406	3410.21	417.402	3593.7	964.119
TAG 46:5 (2)'	101.584	57.316	916.228	55.4927	5856.23	516.128	4928.01	1297.99
TAG 46:6 (1)	189.335	42.4786	387.605	41.399	2115.48	237.75	2467.12	110.235
TAG 46:6 (2)'	96.3571	132.504	580.379	61.3167	2446.78	185.548	1837.57	428.931
TAG 46:6 (3)''	300.075	54.4952	935.579	107.073	13081.9	1164	12877.5	6005.85
TAG 48:3 (1)	877.138	224.022	16511.6	744.642	82934.3	6336.87	103632	9373.72
TAG 48:3 (2)	5400.96	177.515	43100.4	3823.61	243002	20767.7	190128	76081.8
TAG 48:4 (1)	148.798	142.241	2613	299.419	11423.8	668.648	26042.8	6076.66
TAG 48:4 (2)'	1805.81	150.411	21392.2	1114.8	126677	13307.2	102279	44825.5
TAG 48:4 (3)'	380.953	35.9214	26380.7	2732.52	212782	20155.5	178944	65590.3
TAG 48:5 (2)''	3758.41	181.687	27702.5	1974.81	223665	18719.2	171066	80641.3
TAG 48:5 (3)'	1713.96	196.435	9439.41	1303.06	57552.5	8941.46	47183	22242.3
TAG 48:6 (2)'	1165.86	35.4358	11837.8	1121.33	118615	10085.7	107206	28248.6
TAG 48:7 (1)	56.8751	14.0482	1271.72	138.924	11669.7	1156.59	8943.82	3827.85
TAG 48:7 (2)'	132.005	27.3344	3172.75	420.922	62542.4	2930.46	77178.6	7456.24
TAG 48:7 (3)''	190.152	94.4025	4790.7	540.082	26201.2	2185.55	17669.9	7041.44
TAG 48:8 (2)	111.301	15.2212	1351.38	193.245	16188.5	1167.76	9553.15	4456.7
TAG 48:8 (3)'	456.373	74.0152	4274.65	500.125	30772.6	2104.77	24458	10802.5
TAG 48:8 (4)'	53.4551	8.14352	1421.12	123.305	25666.7	2430.17	21919.1	9016.45
TAG 48:9 (3)''	2844.65	451.108	5633.61	776.761	62724.8	4398.57	43538.6	20058.8
TAG 50:1	16776.9	1105.67	335733	8759.75	968049	111827	1.33609e+06	72493.2
TAG 50:2	20006.4	1111.18	330971	6473.09	1.07629e+06	106086	1.46357e+06	21936.2
TAG 50:3 (1)	3083.82	193.233	266962	15231	758604	79533.6	1.12534e+06	33596
TAG 50:3 (2)'	7083.23	427.058	85479.1	11887.8	429216	36636.7	546839	17846.8
TAG 50:4 (1)	2258.32	154.578	84385	2855.66	275897	28626.3	743825	190476
TAG 50:4 (2)'	697.118	65.8056	69931.2	6775.31	364585	26158.9	473101	3164.72
TAG 50:5 (1)	755.712	38.7971	57302.3	3445.35	229142	18774	616606	160200
TAG 50:5 (2)'	883.55	51.8998	252490	10892.2	842569	94122.7	1.07972e+06	21718.9
TAG 50:6 (1)	1351.65	47.7059	102735	7906.49	612185	58737.1	943417	58671.1
TAG 50:6 (2)'	1511.06	33.0063	232329	9454.24	918913	102651	1.18617e+06	4160.1
TAG 50:7 (1)	501.805	133.591	8870.69	1253.66	70247.6	11494.2	117863	4940.41
TAG 50:7 (2)'	1841.23	249.673	258914	3722	1.01332e+06	106421	1.24265e+06	48867.4
TAG 50:8 (1)	386.734	33.612	5575.55	566.429	55021.8	4897.52	60519.1	8698.22
TAG 50:8 (2)'	552.007	26.6535	9742.82	1032.87	55265.4	5400.06	129549	32526.3
TAG 50:8 (3)'	634.918	164.708	4876.62	355.864	37007.8	4283.9	131641	40216.5
TAG 50:9 (1)	149.668	115.397	2373.85	209.076	25625.4	2206.74	26819.8	729.825
TAG 50:9 (2)'	1051.31	145.538	6661.39	771.66	53465.3	4378.32	76251.5	6814.33
TAG 50:9 (3)'	165.855	29.5011	8954.16	970.936	70588.1	5547.05	64913.6	5499.24
TAG 50:10 (2)'	1574.29	227.946	5279.25	814.052	71635.2	4345.48	74346.7	516.663
TAG 50:10 (3)'	1222.83	161.093	9877.81	1065.75	82257.1	5373.74	75719.4	12940.2
TAG 52:1	5256.71	359.117	115468	7763.77	369784	31251.8	634655	118053
TAG 52:2	11893.1	619.439	432764	13025.1	1.06792e+06	113851	1.47788e+06	74929.2
TAG 52:3 (1)	10682.4	682.021	471440	12220.8	1.17596e+06	120618	1.69118e+06	105238
TAG 52:4 (1)	9503.82	361.989	602502	22784.1	1.33126e+06	138898	2.17573e+06	235566
TAG 52:5 (1)	8647.62	478.954	492417	21340.6	1.18655e+06	137628	2.38185e+06	382565
TAG 52:5 (3)'	650.611	103.186	82157.1	7710.93	336201	23336.5	564315	110730
TAG 52:6 (1)	7032.79	636.607	385477	21412	1.10586e+06	120969	1.80788e+06	180588
TAG 52:6 (3)'	1597.89	168.137	220828	10230.5	537202	56764.6	766395	88812.8
TAG 52:7 (1)	2013.92	190.437	129867	11610.2	398865	37536.5	631695	105965
TAG 52:7 (3)'	2743.58	149.74	294775	11489.9	782979	79867.5	1.5471e+06	301502
TAG 52:8 (1)	1109.09	148.261	52794.5	4445.3	216890	21448.2	385091	85036.2
TAG 52:8 (2)'	8842.68	1770.15	350703	12153.4	884562	85217	1.17833e+06	93090.1
TAG 52:9 (1)	795.065	180.353	24151.9	3191.73	152066	15338.4	250199	55101
TAG 52:9 (2)'	54961.2	12034.8	292974	17870.6	998105	95792.1	1.23842e+06	53470.5
TAG 54:1	3027.28	186.593	121168	10753	332456	23531.3	216469	62555.9
TAG 54:2	3140.75	268.507	167134	11738.9	535196	48412.8	498589	56038.8
TAG 54:3 (1)	5136.84	260.865	223316	10558.5	473003	43244	369821	84963
TAG 54:4 (1)	4722.14	570.913	211941	6889.29	479985	41630.7	530928	22049.7
TAG 54:5 (1)	6520.63	229.585	304634	6920.02	653419	56089.4	578019	98756.4
TAG 54:5 (3)'	470.565	79.537	39553.9	4100.88	146765	8962.16	102865	16024.6
TAG 54:6 (1)	5237.43	658.936	172705	7727.44	548812	55752.7	462007	123343
TAG 54:6 (2)	2718.18	158.758	93208.3	8569.58	258181	27448.9	295525	164.414
TAG 54:6 (3)'	516.463	127.236	32100.2	2768.67	118059	8594.32	164294	18983
TAG 54:7 (1)	5953.22	950.353	150623	7186.36	525725	54137.9	423443	116557
TAG 54:7 (2)'	5240.81	883.135	72514.7	10494.8	201463	13381.9	258914	425.63
TAG 54:7 (3)'	510.509	81.7174	43420.8	2719.05	196440	14981.3	227656	439.625
TAG 54:8 (1)	4276.42	916.177	71633.4	5167.03	320306	32559.2	269088	98379.7
TAG 54:8 (2)'	6212.87	963.799	58872.6	5733.7	243660	17019.3	281480	1223.52
TAG 54:8 (3)''	1884.62	271.446	9643.03	499.42	22571.8	1732.43	113408	40638.4
TAG 54:9 (1)	1501.23	251.539	25952.6	2829.17	197970	19246.4	137736	64929.4
TAG 54:9 (2)'	3433.7	724.668	26093.2	2791.39	145597	10831	218465	16111.1
TAG 56:1	2959.27	99.3368	49331.1	5167.24	143948	9181.11	81891.6	30293.2
TAG 56:2	949.822	104.569	112481	10382.6	371993	27573.7	222164	96947.7
TAG 56:3 (1)	945.169	111.512	68401.6	5721.21	270606	23164.6	177387	74646.4
TAG 56:4 (1)	621.453	42.0778	16247.4	622.59	41389.7	5471.98	24905.9	9071.78
TAG 56:4 (2)	267.767	55.2557	11804.3	1017.89	47256.6	4642.16	44105.9	12698
TAG 56:5 (1)	933.233	52.6181	18833.7	1173.24	59640.1	4540.18	50336.6	12926.5
TAG 56:5 (3)'	139.373	5.97693	9072.97	899.902	31661.1	1666.21	18376	4041.89
TAG 56:6 (1)	766.154	79.6113	4079.3	203.165	14714.6	2020.91	15153.4	5648.18
TAG 56:6 (2)'	429.686	27.8242	6680.44	380.427	26381.1	2491.07	16323	4242.38
TAG 56:6 (3)'	119.673	10.3151	5766.35	501.1	18549.3	1419.73	12730.7	3093.8
TAG 56:7 (1)	496.708	68.1719	3584.53	331.051	8731.17	890.295	6835.51	2110.11
TAG 56:7 (3)'	264.412	58.734	7457.84	427.141	26101.2	2157.15	16587	5307.34
TAG 58:1	2204.64	57.0285	28833	3224.69	87747.6	5954.99	50250.4	17148.9
TAG 58:2	572.628	74.4505	52124.6	5631.88	195595	12862.5	112375	48287.6
TAG 58:3	545.358	29.6759	30782.6	2950.66	146953	10943.3	95855.9	40543.7
TAG 58:4	396.366	28.9637	14423.8	1439.96	72043.8	6031.38	49890.7	20709.6
TAG 58:5 (1)	188.516	30.557	2966.96	246.987	12893.2	1165.42	8707.65	2130.63
TAG 58:5 (2)'	68.8081	13.1966	4582.08	558.585	17893.6	1167.51	9939.61	2321.73
TAG 58:5 (3)''	291.437	44.7291	1614.35	105.617	4657.08	757.067	4992.25	2353.37
TAG 58:6 (1)	870.436	39.1034	1888.59	77.4892	8662.38	1083.98	9526.58	2909.12
TAG 58:6 (2)'	468.216	36.6579	3934.14	342.081	20178.6	1512.06	11570.4	3872.6
TAG 58:6 (3)'	92.3562	24.7154	3240.53	270.717	12310.4	693.868	7257.91	2125.94
TAG 60:1	981.899	78.8608	8551.09	966.996	49114.4	2902.62	45752.8	6416.75
TAG 60:2	959.87	128.567	24421.3	2862.89	116738	8863.22	75596.2	25397.9
TAG 60:3	441.276	51.7319	12369.2	1550.62	93594.8	5793.77	74656.2	22434.4
TAG 60:4	272.426	26.4691	8495.9	874.703	53047.8	3495.66	43395.9	12818.6
TAG 60:5 (1)	179.176	44.5384	3212.02	231.615	19194.2	1441.22	14031.9	6614.69
TAG 60:5 (2)'	80.5084	56.2211	1172.91	145.018	7303.01	900.931	9552.59	875.171
TAG 60:5 (3)'	31.2485	37.7507	1488.37	130.99	13332.1	804.637	16201.7	902.226
TAG 60:6 (1)	1228.71	99.6025	2423.27	286.806	16968.3	1239.75	13042.7	1811.91
TAG 60:6 (2)'	66.6588	23.3832	1187.75	135.325	11606.1	714.553	12525.6	303.76
TAG 60:6 (3)''	26.0995	32.3111	937.028	57.3071	5021.34	715.176	4393.19	2070.97

## Sheet: Internal std peak areas
each sample was spiked with 0.05-0.2 µg/ml of standard mixture which was later used for recovery assesment:
Std:	C-1	C-2	C-3	C-4	N24h-1	N24h-2	N24h-3	N24h-4	N96h-1	N96h-2	N96h-3	N96h-4	N7d-1	N7d-2
IS 34:0 PE	699.379	525.82	577.313	526.435	508.502	629.818	525.815	567.844	421.991	359.089	367.76	313.541	631.386	567.911
IS 34:0 PC	1794.53	1409.7	1351.95	1309.36	2380.11	2535.57	2234.09	2121.94	2316.39	2202.97	1930.77	1974.67	3066.82	2638.28
IS TG 62:16 d5	999.155	938.445	913.272	815.147	1142.25	982.067	1140.85	1049.32	1027.04	914.402	73.609	54.351	903.418	859.821
IS TG 44:1 d5	1518.31	1563.77	1622.43	1478.42	1762.6	1655.31	1576.98	1544.54	1233.34	1156.13	1114.74	1085.89	1325.54	1157.46
IS TG 48:1 d5	1482.8	1488.87	1478.7	1335.87	818.699	804.214	772.244	703.7	357.437	367.639	292.745	298.167	348.668	312.076
IS TG 50:0 d5	2331	2025.14	2154.5	2120.22	2555.51	2500.12	2438.98	2326.98	1517.15	1209.14	1151.09	1110.14	1891.63	2059.5
IS TG 51:1 d5	1276.18	1115.01	1214.14	1182.98	1416.57	1357.12	1330.93	1236.19	1448.34	1369.94	1213.55	1224.66	1357.51	1744.82
IS TG 60:1 d5	882.802	820.992	921.306	818.553	1042.59	1096.04	974.511	989.205	884.393	734.47	693.452	663.422	978.997	996.039
IS TG 58:7 d5	1639.91	1605.19	1613.67	1434.99	984.784	974.091	970.552	864.105	512.429	309.997	326.937	379.452	462.971	546.705
IS TG 58:10 d5	1281.56	1147.21	1157.69	1085.23	870.517	841.445	768.986	790.081	460.239	361.496	338.069	299.747	316.293	271.01
