# Supplementary material for: Fatty Acid Production and Direct Acyl Transfer through Polar Lipids Control TAG Biosynthesis during Nitrogen Deprivation in the Halotolerant Alga Dunaliella tertiolecta
Source: Mar Drugs. 2021 Jun 25;19(7):368. doi: 10.3390/md19070368 (PMC8304655; doi:10.3390/md19070368)
Supplement: Supplementary file 1 [file marinedrugs-19-00368-s001.zip › Supplementary Tables.xlsx]

## Sheet: Table S1
Table S1
Quenching of 14C-PlA incorporation.
Quencher	Total cpm	cpm (1’)	%	cpm (10’)	%	cpm (30’)	%
-	120000 ± 15000	78000 ± 9020	65 ± 9	85000 ± 7900	71 ± 7	88000 ± 8100	65 ± 7
PlA	116000 ± 11000	3500 ± 410	3 ± 3	3800 ± 290	3.3 ± 4	10000 ± 780	7.1 ± 4
PlA+BSA	108000 ± 10000	850 ± 77	0.8 ± 0.5	910 ± 78	0.8 ± 1	2800 ± 300	2.6 ± 3

## Sheet: Table S2
Table S2
Time course of incorporation of 14C-PlA into lipids in complete and in N-deprived media.
	+N		-N
Time of incubation:	cpm	% of total	cpm	% of total
0	2000 ± 169	0.8 ± 0.5	1700 ± 220	0.6 ± 0.2
2’	39000 ± 2980	11.1 ± 2	27000 ± 1540	10 ± 1.5
5’	60700 ± 5200	23.5 ± 1.9	48750 ± 3240	18.1 ± 1.4
10’	73000 ± 620	28.1 ± 3	73500 ± 6800	27.2 ± 2
20’	84200 ± 690	32.3 ± 3	101400 ± 8900	37.5 ± 3
40’	118800 ± 10220	45.7 ± 3.7	127200 ± 11980	47± 3.6
1h	130300 ± 11020	50 ± 4.2	138300 ± 12670	51.1 ± 4.4
2h	140600 ± 10920	54.1 ± 5	148500 ± 11340	55 ± 5
4h	149000 ± 8900	57.3 ± 5	156000 ± 13270	57.8 ± 5
10h	155500 ± 12490	59.6 ± 5.6	171000 ± 15040	63.3 ± 7

## Sheet: Table S3
Table S3
A comparison of different quenching conditions for lipid extraction.
Quenching conditions	DPM in FA band
DMSO, no heating	1,300 ± 220
DMSO, heating to 70°C	1,770 ± 310
DMSO, heating to 90°C	1,469 ± 120
Iso-propanol, heating to 90°C	1,510 ± 185
DMSO+2 mL MeOH+ 1 mL CHCl3, no heating	1,540 ± 200
10% trichloroacetic acid	1,680 ± 155
BSA treatment, DMSO, 70°C	1,420 ± 120
